# Supplementary material
Source: publisher figshare collection journal article supplement (https://sage.figshare.com/ndownloader/files/17785469)
Supplement: Supplementary file 1 [file 17785469]

## Supplemental material – tables and figures

Table A.1: Total number of museums according to official data (Istat) and OSM data

| Region                | Istat       |               | OpenStreetMap (OSM) |               | Difference (OSM-ISTAT) | Share (OSM / ISTAT) |
|-----------------------|-------------|---------------|---------------------|---------------|------------------------|---------------------|
|                       | Museum nr.  | %             | Museum nr.          | %             |                        |                     |
| Piemonte              | 362         | 8.7%          | 297                 | 8.3%          | -65                    | 82%                 |
| Valle D'Aosta         | 68          | 1.6%          | 33                  | 0.9%          | -35                    | 49%                 |
| Lombardia             | 361         | 8.7%          | 429                 | 12.0%         | 68                     | 119%                |
| Trentino-Alto Adige   | 163         | 3.9%          | 200                 | 5.6%          | 37                     | 123%                |
| Veneto                | 290         | 7.0%          | 284                 | 7.9%          | -6                     | 98%                 |
| Friuli Venezia Giulia | 162         | 3.9%          | 142                 | 4.0%          | -20                    | 88%                 |
| Liguria               | 202         | 4.9%          | 207                 | 5.8%          | 5                      | 102%                |
| Emilia-Romagna        | 428         | 10.3%         | 284                 | 7.9%          | -144                   | 66%                 |
| Toscana               | 446         | 10.7%         | 337                 | 9.4%          | -109                   | 76%                 |
| Umbria                | 140         | 3.4%          | 130                 | 3.6%          | -10                    | 93%                 |
| Marche                | 303         | 7.3%          | 90                  | 2.5%          | -213                   | 30%                 |
| Lazio                 | 281         | 6.8%          | 260                 | 7.3%          | -21                    | 93%                 |
| Abruzzo               | 102         | 2.5%          | 58                  | 1.6%          | -44                    | 57%                 |
| Molise                | 29          | 0.7%          | 24                  | 0.7%          | -5                     | 83%                 |
| Campania              | 160         | 3.8%          | 187                 | 5.2%          | 27                     | 117%                |
| Puglia                | 128         | 3.1%          | 108                 | 3.0%          | -20                    | 84%                 |
| Basilicata            | 37          | 0.9%          | 27                  | 0.8%          | -10                    | 73%                 |
| Calabria              | 155         | 3.7%          | 74                  | 2.1%          | -81                    | 48%                 |
| Sicilia               | 175         | 4.2%          | 220                 | 6.2%          | 45                     | 126%                |
| Sardegna              | 166         | 4.0%          | 182                 | 5.1%          | 16                     | 110%                |
| <b>ITALY</b>          | <b>4158</b> | <b>100.0%</b> | <b>3573</b>         | <b>100.0%</b> | <b>-585</b>            | <b>86%</b>          |

Data source: Istat and OSM (© OpenStreetMap contributors)

Table A.2: Keys associated with the museums elements on the OSM database

| Variable     | N    | %      | Variabile    | N  | %    |
|--------------|------|--------|--------------|----|------|
| x            | 3573 | 100.0% | contactfax   | 16 | 0.4% |
| y            | 3573 | 100.0% | contactmob   | 14 | 0.4% |
| id           | 3573 | 100.0% | short_name   | 14 | 0.4% |
| tourism      | 3568 | 99.9%  | addrdistrict | 12 | 0.3% |
| name         | 3333 | 95.1%  | charge       | 12 | 0.3% |
| addrstreet   | 1012 | 28.3%  | facebook     | 12 | 0.3% |
| addrhousen~r | 848  | 23.7%  | museum       | 12 | 0.3% |
| addrcity     | 832  | 23.3%  | namees       | 12 | 0.3% |
| wikidata     | 806  | 22.6%  | nameko       | 12 | 0.3% |
| wikipedia    | 796  | 22.3%  | addrcityde   | 11 | 0.3% |
| addrpostcode | 745  | 20.8%  | addrcityit   | 11 | 0.3% |
| website      | 726  | 20.3%  | artwork_type | 11 | 0.3% |

|              |     |       |                                    |    |      |
|--------------|-----|-------|------------------------------------|----|------|
| opening_ho~s | 451 | 12.6% | building                           | 11 | 0.3% |
| phone        | 428 | 12.0% | descriptio~u                       | 11 | 0.3% |
| wheelchair   | 287 | 8.0%  | nametr                             | 11 | 0.3% |
| operator     | 286 | 8.0%  | commentit                          | 9  | 0.3% |
| addrcountry  | 267 | 7.5%  | contactfac~k                       | 9  | 0.3% |
| email        | 240 | 6.7%  | ele                                | 9  | 0.3% |
| source       | 167 | 4.7%  | namesc                             | 9  | 0.3% |
| nameit       | 158 | 4.4%  | showroom                           | 9  | 0.3% |
| description  | 116 | 3.2%  | addrhamlet                         | 8  | 0.2% |
| nameen       | 109 | 3.1%  | addrstreetde                       | 8  | 0.2% |
| namede       | 77  | 2.1%  | addrstreetit                       | 8  | 0.2% |
| fee          | 73  | 2.1%  | descriptio~t                       | 8  | 0.2% |
| fax          | 69  | 1.9%  | addrneighb~d                       | 6  | 0.2% |
| level        | 69  | 1.9%  | created_by                         | 6  | 0.2% |
| namehu       | 66  | 1.8%  | culture                            | 6  | 0.2% |
| note         | 59  | 1.7%  | internet_a~s                       | 6  | 0.2% |
| entrance     | 50  | 1.4%  | namept                             | 6  | 0.2% |
| toiletswe~r  | 48  | 1.4%  | old_name                           | 6  | 0.2% |
| contactphone | 47  | 1.3%  | phone_1                            | 6  | 0.2% |
| namezh       | 45  | 1.3%  | addrsuburb                         | 5  | 0.1% |
| loc_ref      | 44  | 1.2%  | addrunit                           | 5  | 0.1% |
| contactweb~e | 42  | 1.2%  | bunker_type                        | 5  | 0.1% |
| start_date   | 42  | 1.2%  | contactwi~r                        | 5  | 0.1% |
| alt_name     | 39  | 1.1%  | fixme                              | 5  | 0.1% |
| addrhouse~me | 34  | 1.0%  | is_in                              | 5  | 0.1% |
| nameru       | 34  | 1.0%  | layer                              | 5  | 0.1% |
| refdatiopen  | 34  | 1.0%  | military                           | 5  | 0.1% |
| sourceurl    | 34  | 1.0%  | nameuk                             | 5  | 0.1% |
| contactemail | 30  | 0.8%  | official_~me                       | 5  | 0.1% |
| historic     | 27  | 0.7%  | ref                                | 5  | 0.1% |
| addrprovince | 22  | 0.6%  | shop                               | 5  | 0.1% |
| namefr       | 22  | 0.6%  | sourcewhee                         | 5  | 0.1% |
| addrplace    | 20  | 0.6%  | addrstate                          | 3  | 0.1% |
| amenity      | 19  | 0.5%  | emailde                            | 3  | 0.1% |
| nameja       | 19  | 0.5%  |                                    |    |      |
| wheelchair~n | 19  | 0.5%  |                                    |    |      |
| url          | 17  | 0.5%  | Other 81 fields with frequency = 1 |    |      |

Data source: Istat and OSM (© OpenStreetMap contributors)

Table A.3: Examples of inconsistency in the mapping of OSM museums

| Possible reason of inconsistency:                                    | Bergamo   |             | Bologna   |             | Roma      |             |
|----------------------------------------------------------------------|-----------|-------------|-----------|-------------|-----------|-------------|
| Tagging the container building, villa or garden as a museum          | 1         | 8%          | 2         | 12%         | 14        | 23%         |
| Tagging archaeological areas as museums                              | 0         | 0%          | 0         | 0%          | 7         | 11%         |
| Including museums which do not meet eligibility criteria             | 4         | 31%         | 10        | 59%         | 22        | 36%         |
| Mapping art shops and private galleries which are not actual museums | 8         | 62%         | 3         | 18%         | 9         | 15%         |
| Other reasons                                                        | 0         | 0%          | 2         | 12%         | 9         | 15%         |
| <b>Total OSM-only museums</b>                                        | <b>13</b> | <b>100%</b> | <b>17</b> | <b>100%</b> | <b>61</b> | <b>100%</b> |

Data source: Istat and OSM (© OpenStreetMap contributors)

Note: Illustrative experiment conducted in three cities only. The reasons for inconsistency are elaborated by the author and not verified with the OSM community or contributors who created the object

Figure A.1: Museums mapped in both sources, only in official data (Istat) and only in OSM data

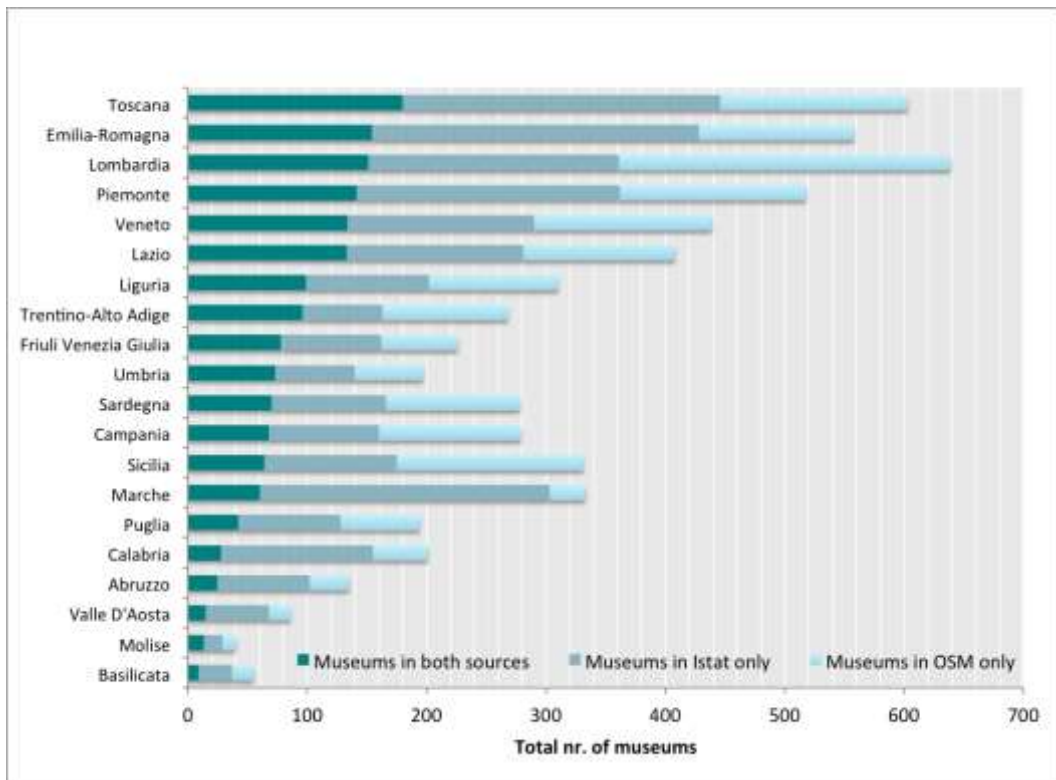

Figure A.2. Examples of museums mapped both as points and as polygons (museum/garden of Boboli, Florence, left; and Regional Museum of Science, Turin, right)

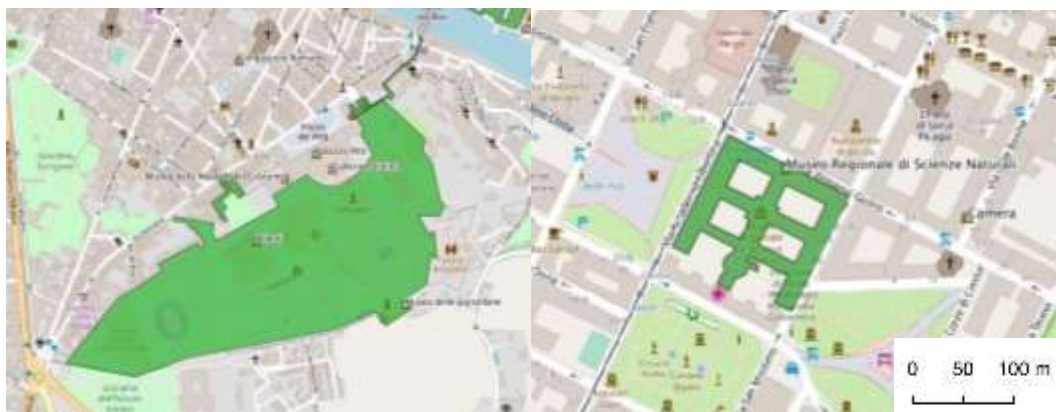

Data source: Istat and OSM (© OpenStreetMap contributors)

Figure A.3: Density of museums (*Kernel Density Estimation*), official data (left - red) and OSM data (right - green)

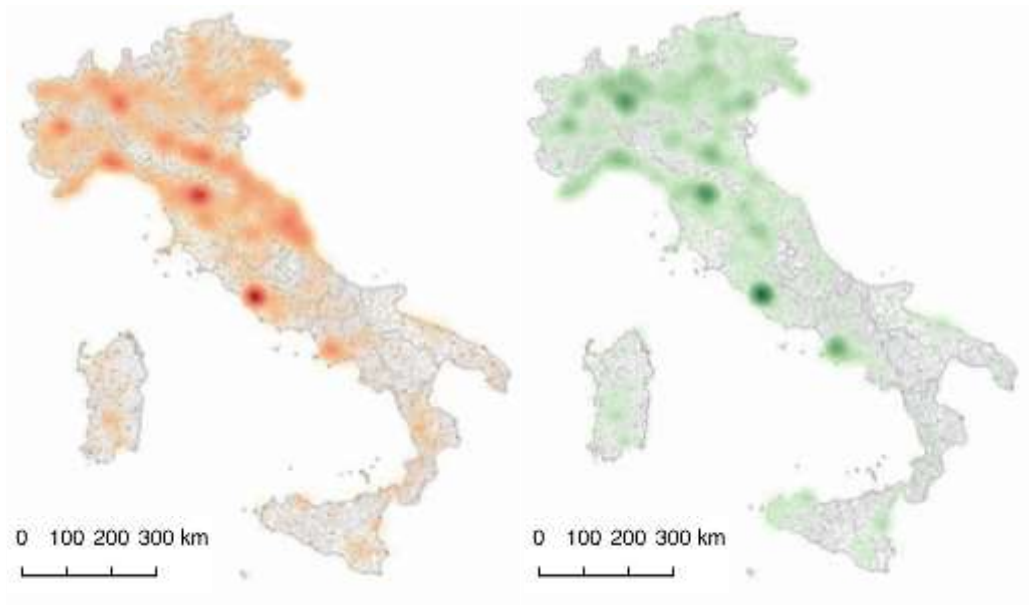

Data source: Istat and OSM (© OpenStreetMap contributors)

Fig. A.4: Total number of museums: comparison among OSM data and official data (5km square grid)

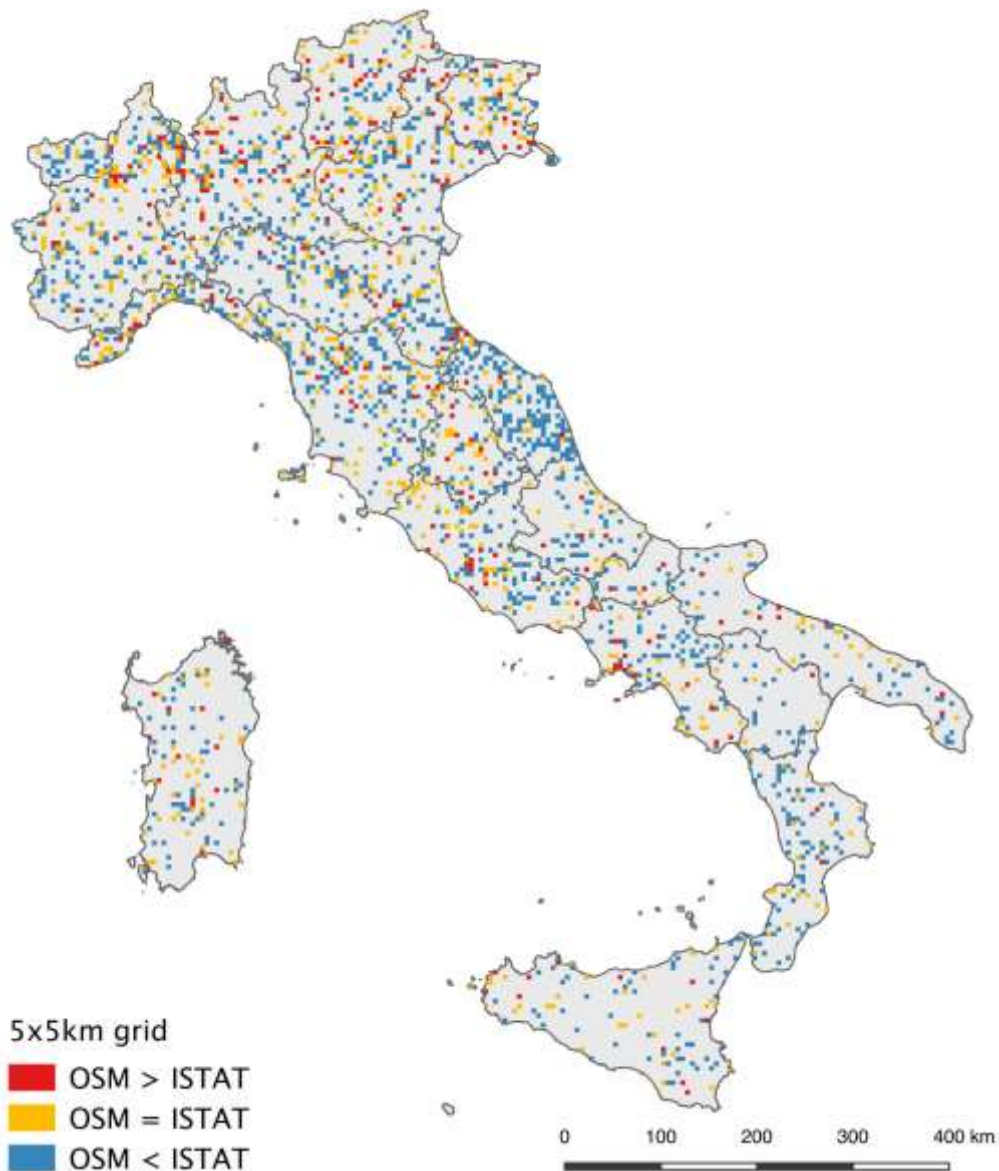

Data source: Istat and OSM (© OpenStreetMap contributors)

Caption: 2362 cells contained at least a museum; they accounted for 18% of the total number of cells and covered a 60-thousand square kilometres area. In 40% of those cells (coloured in red) the number of museums was higher in OSM than in official data. The cells in which the OSM source was lacking (coloured in blue), were mostly located in the inland areas of Marche, Emilia-Romagna and Tuscany in Central Italy, Piemonte in Northern, Lazio, Abruzzo and Calabria in Southern. Agglomerations of orange/red cells were evident around the main urban areas (such as Rome, Naples, Milan, Turin etc.) and in a horizontal band lying across northern Italy

Figure A.5: OSM coverage in Italian municipalities

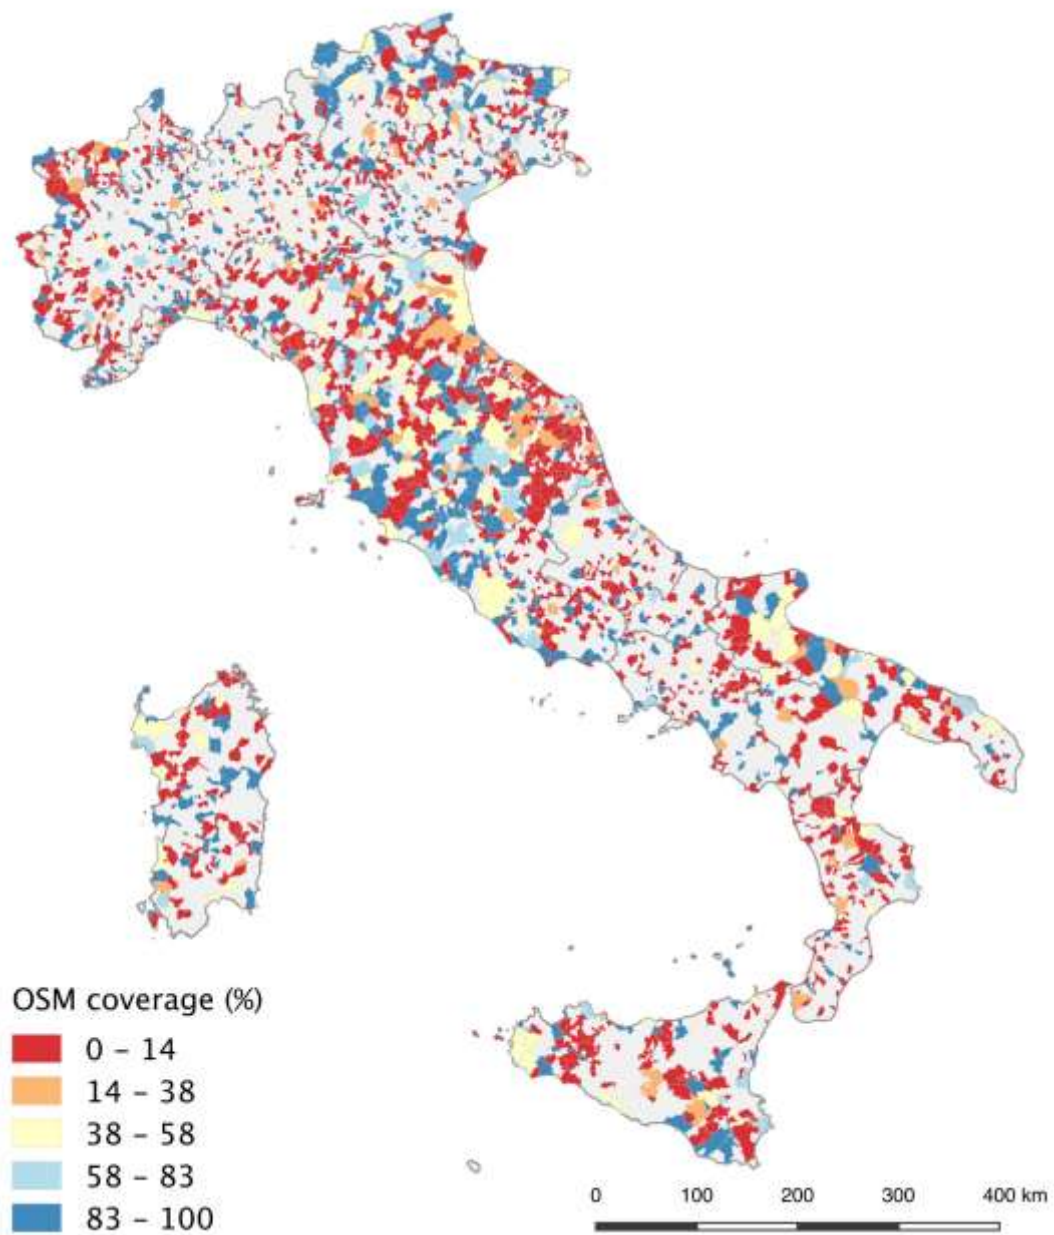

Data source: Istat and OSM (© OpenStreetMap contributors)



Figure A.6: Point data: Istat museums (red circles) and OSM museums (green squares)

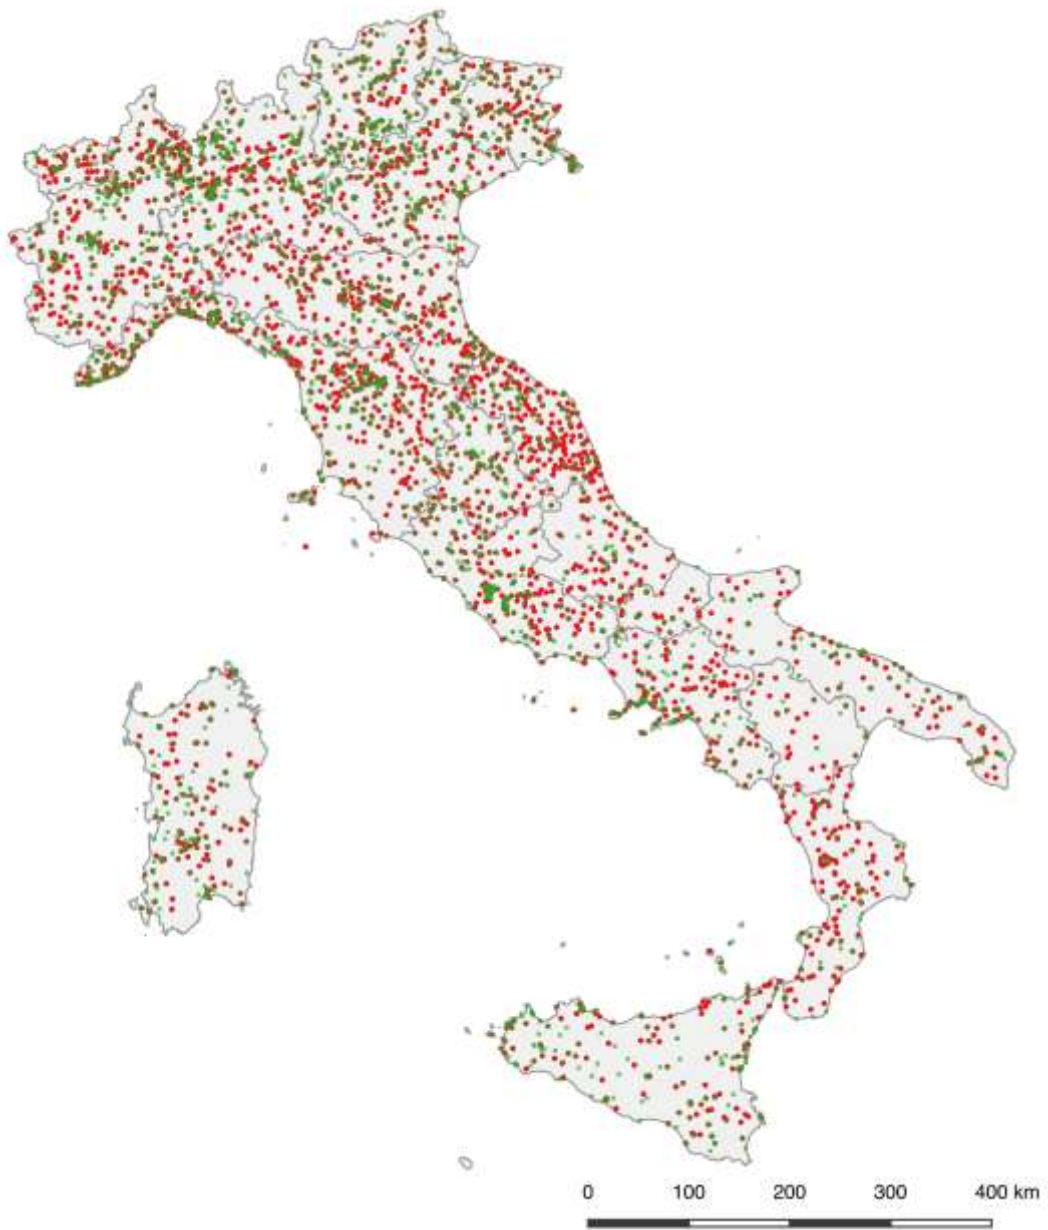

Data source: Istat and OSM (© OpenStreetMap contributors)
